# Supplementary material for: Enhancing the catalytic performance of Ni based catalysts in toluene reforming at low temperature by structuring on SiC extrudates
Source: Royal Society of Chemistry journal article supplement (doi:10.1039/d3se00705g), 2023-01-01
Supplement: d3se00705g1.pdf [file d3se00705g1.pdf]

## Enhancing the catalytic performance of Ni based catalysts in toluene reforming at low temperature by structuration on SiC extrudates

Lole Jurado<sup>a,±\*</sup>, Michaël Martin Romo y Morales<sup>a</sup>, Sébastien Thomas<sup>a</sup> and Anne-Cécile Roger<sup>a</sup>

<sup>a</sup> Institute of Chemistry and Processes for Energy, Environment and Health, ECPM, UMR 7515, University of Strasbourg, 25 rue Becquerel, F-67087 Strasbourg, France

<sup>±</sup> Current affiliation: Instituto de Ciencia de Materiales de Sevilla, Centro Mixto Universidad de Sevilla-CSIC, Américo Vespucio 49, 41092 Sevilla, Spain.

\*Corresponding author: Lole Jurado ([dolores.jurado@icmse.csic.es](mailto:dolores.jurado@icmse.csic.es))

### Supporting information

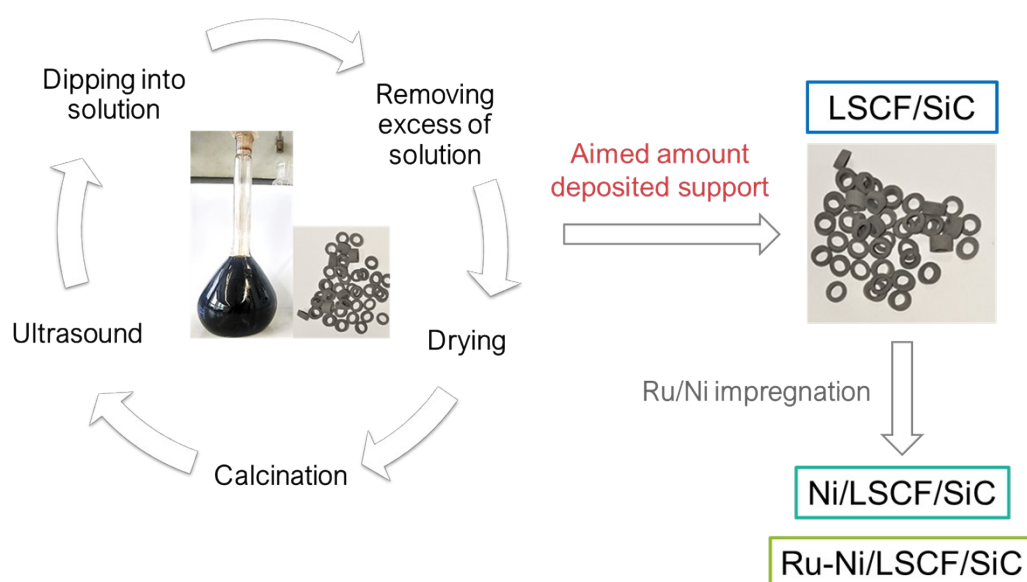

**Fig 1S.** Dip coating procedure of the LSCF precursor solution and impregnation of active phases (Ni and Ru)

**Table 1S.** Elemental composition of  $\beta$ -SiC-based extrudates (provided by SICAT)

|                   | Fe   | Al   | Ca  | Na | K   | S  |
|-------------------|------|------|-----|----|-----|----|
| Composition (ppm) | 3000 | 1000 | 400 | 80 | 100 | 50 |

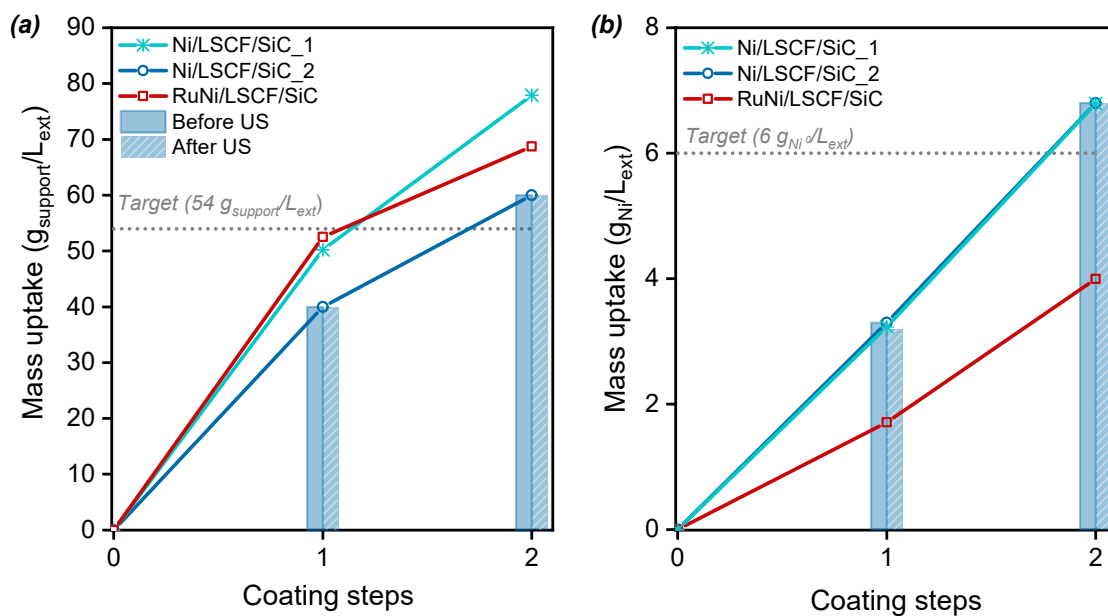

**Fig 2S.** Mass uptake and ultrasound test after the coating of (a) LSCF and (b) Ni for several batches.

**Table 2S.** Mass uptake and Ni loading of the batches prepared.

|               | Mass uptake LSCF<br>(g/L <sub>ext</sub> ) | Mass uptake of Ni<br>(g/L <sub>ext</sub> ) | Ni loading (%) |
|---------------|-------------------------------------------|--------------------------------------------|----------------|
| Ni/LSCF/SiC_1 | 77.9                                      | 6.8                                        | 8.0            |
| Ni/LSCF/SiC_2 | 60.0                                      | 6.8                                        | 10.2           |
| RuNi/LSCF/SiC | 68.7                                      | 4.0                                        | 5.5            |

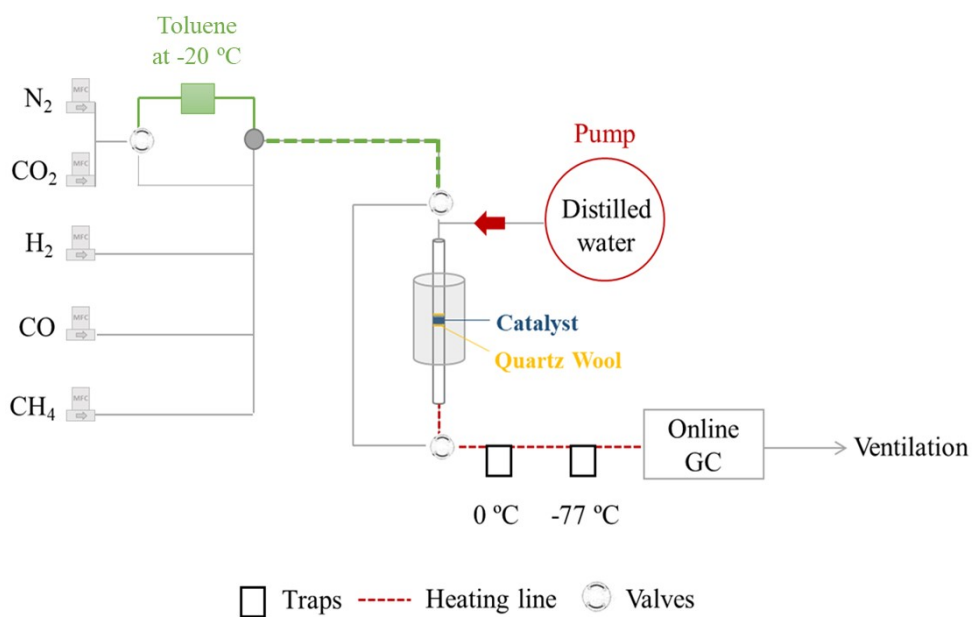

**Fig 3S.** Scheme of the lab scale plant used for toluene reforming reaction (adapted from ref [1])

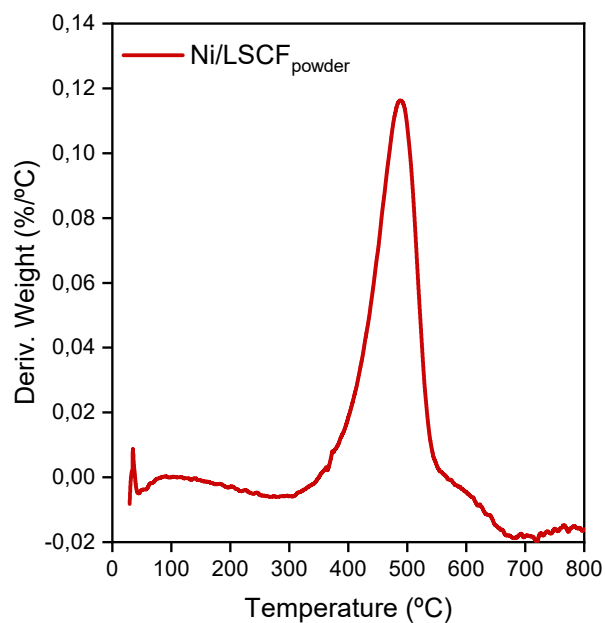

**Fig 4S.** Derivative of the TGA curve versus temperature of Ni/LSCF powder after the pre-treatment under model ex-biomass atmosphere.

**Table 3S.** H<sub>2</sub> consumption and support reducibility of powdered and structured catalysts

|                                   | <b>H<sub>2</sub> consumption<br/>(mmol/g<sub>catalyst</sub>)</b> | <b>Support reducibility<br/>(%)</b> |
|-----------------------------------|------------------------------------------------------------------|-------------------------------------|
| <i>LSCF<sub>solution</sub></i>    | 4.4                                                              | 31                                  |
| <i>Ni/LSCF<sub>powder</sub></i>   | 5.9                                                              | 54                                  |
| <i>RuNi/LSCF<sub>powder</sub></i> | 5.4                                                              | 56                                  |
| <i>LSCF/SiC</i>                   | 1.4                                                              | 10                                  |
| <i>Ni/LSCF/SiC</i>                | 4.6                                                              | 38                                  |
| <i>RuNi/LSCF/SiC</i>              | 4.9                                                              | 40                                  |

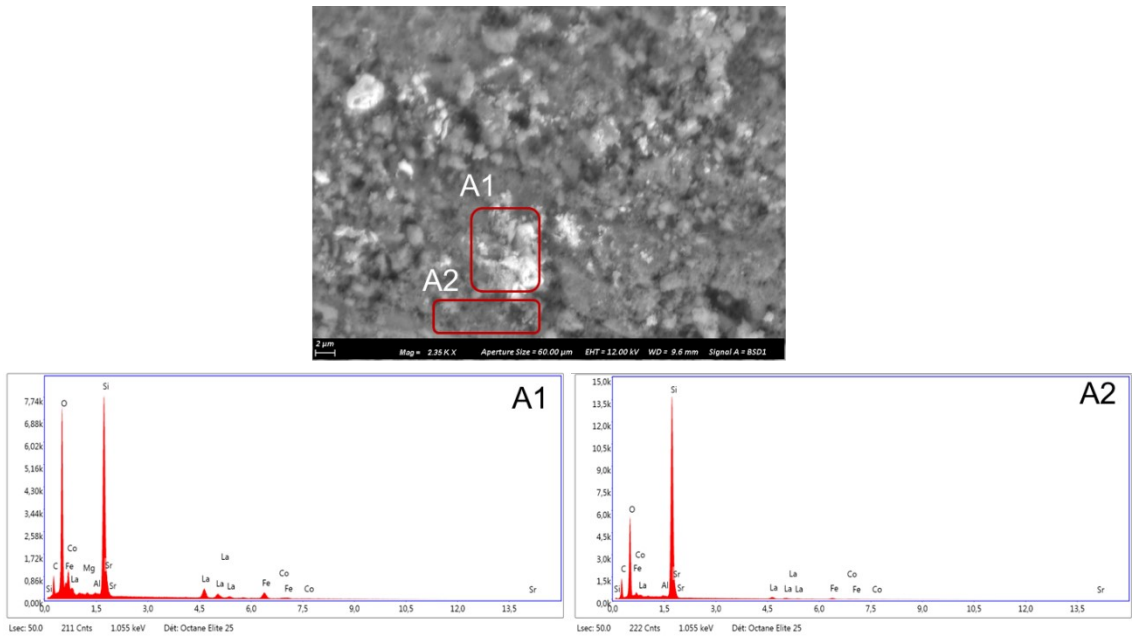

**Fig 5S.** SEM image and EDX analyses of LSCF/SiC

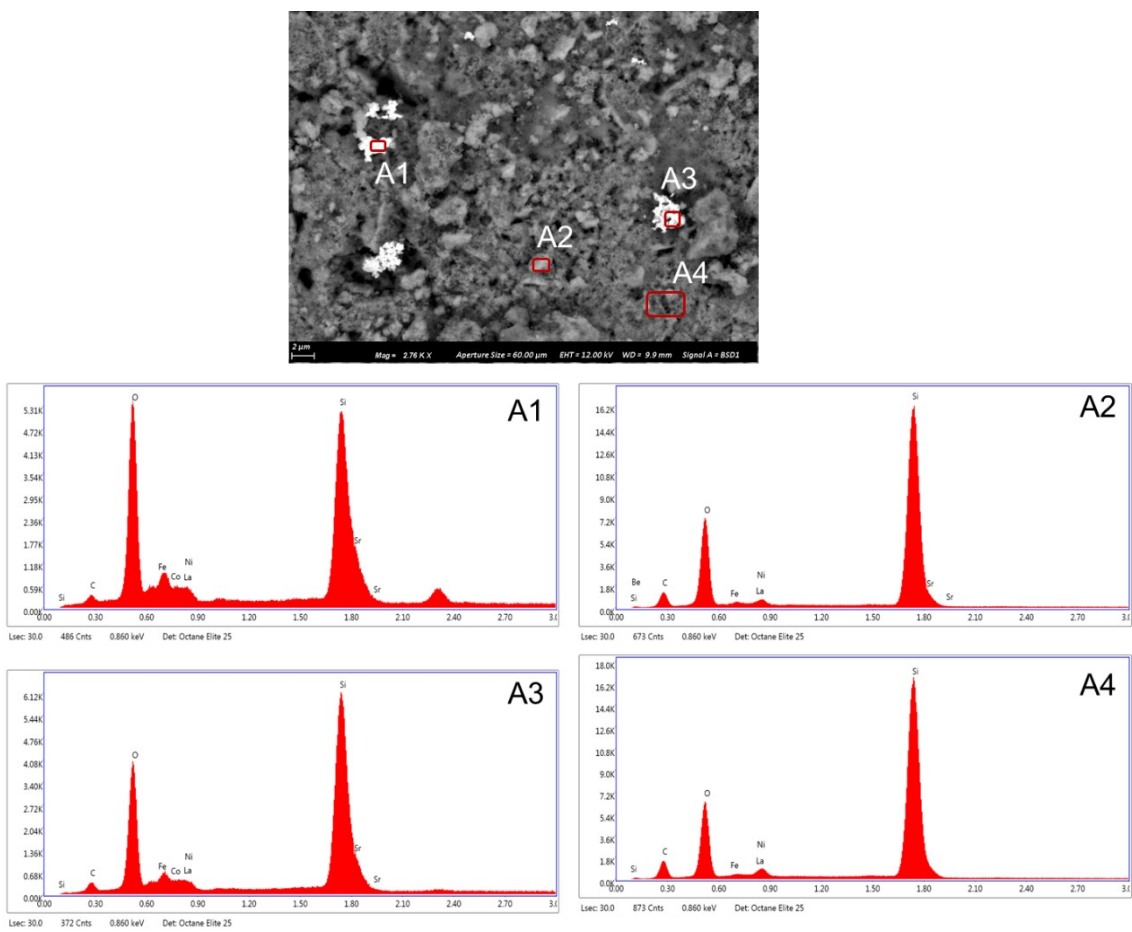

**Fig 6S.** SEM image and EDX analyses of Ni/LSCF/SiC

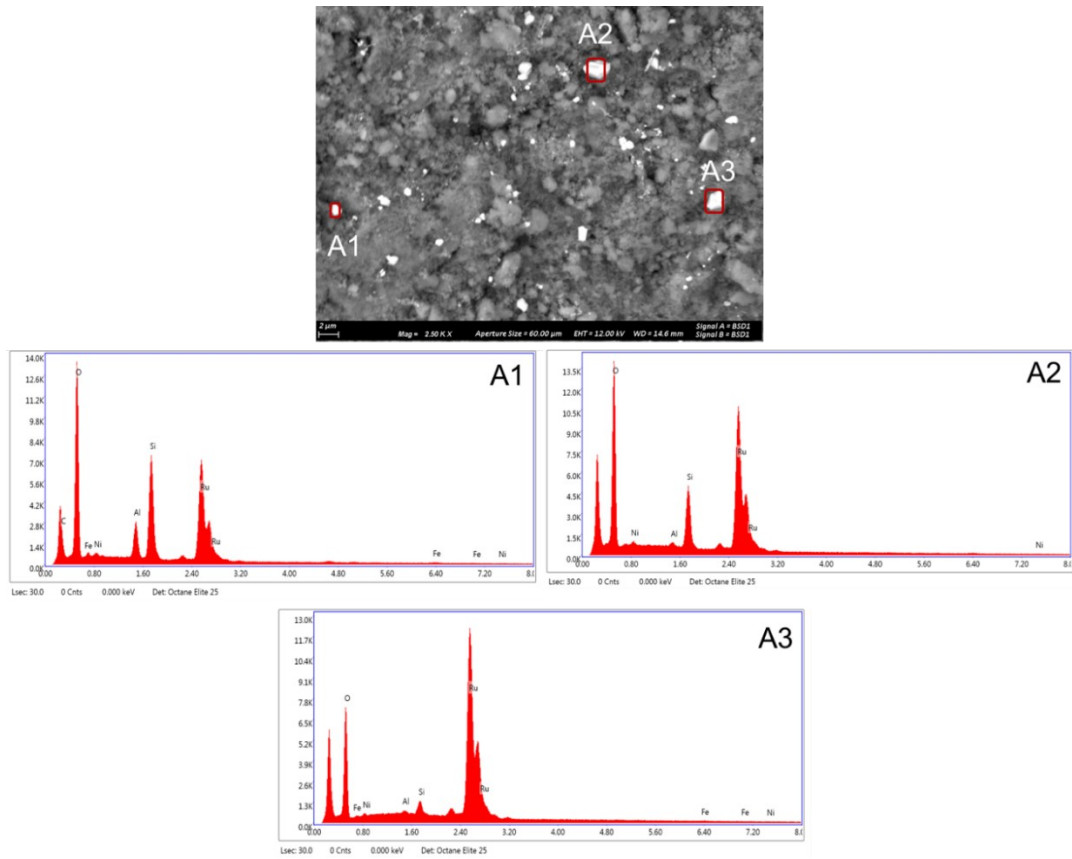

**Fig 7S.** SEM image and EDX analyses of RuNi/LSCF/SiC

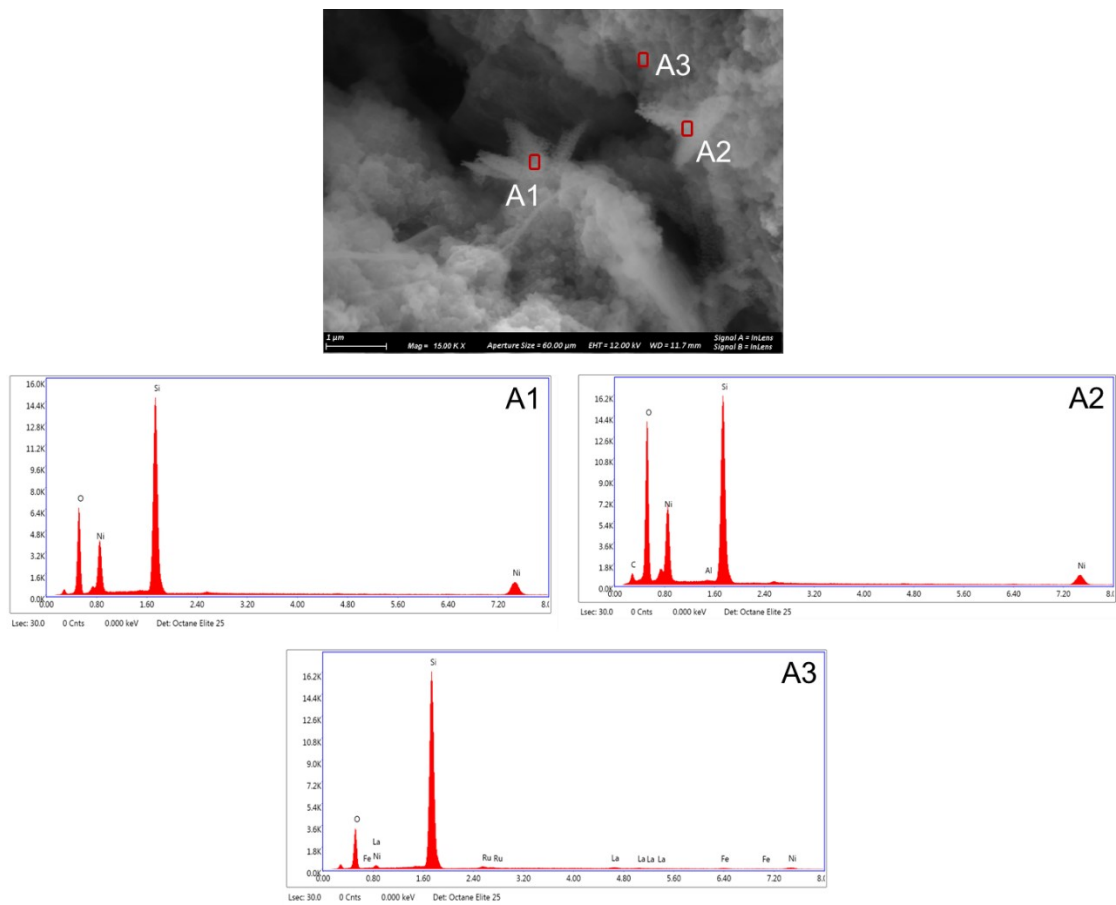

**Fig 8S.** SEM image and EDX analyses of RuNi/LSCF/SiC

The variation of the partial molar flows of each gas compound compared to the inlet one (dashed lines) versus time during toluene reforming for LSCF after pre-treatment in  $H_2$  atmosphere (prior reported in ref [2]) and (Ru)Ni/LSCF after pre-treatment in model ex-biomass atmosphere is presented in **Fig 7S**. It can be observed that same catalytic activity toward WGS is exhibited for the catalysts pre-treated under model ex-biomass atmosphere and the bare support pre-treated under  $H_2$ .

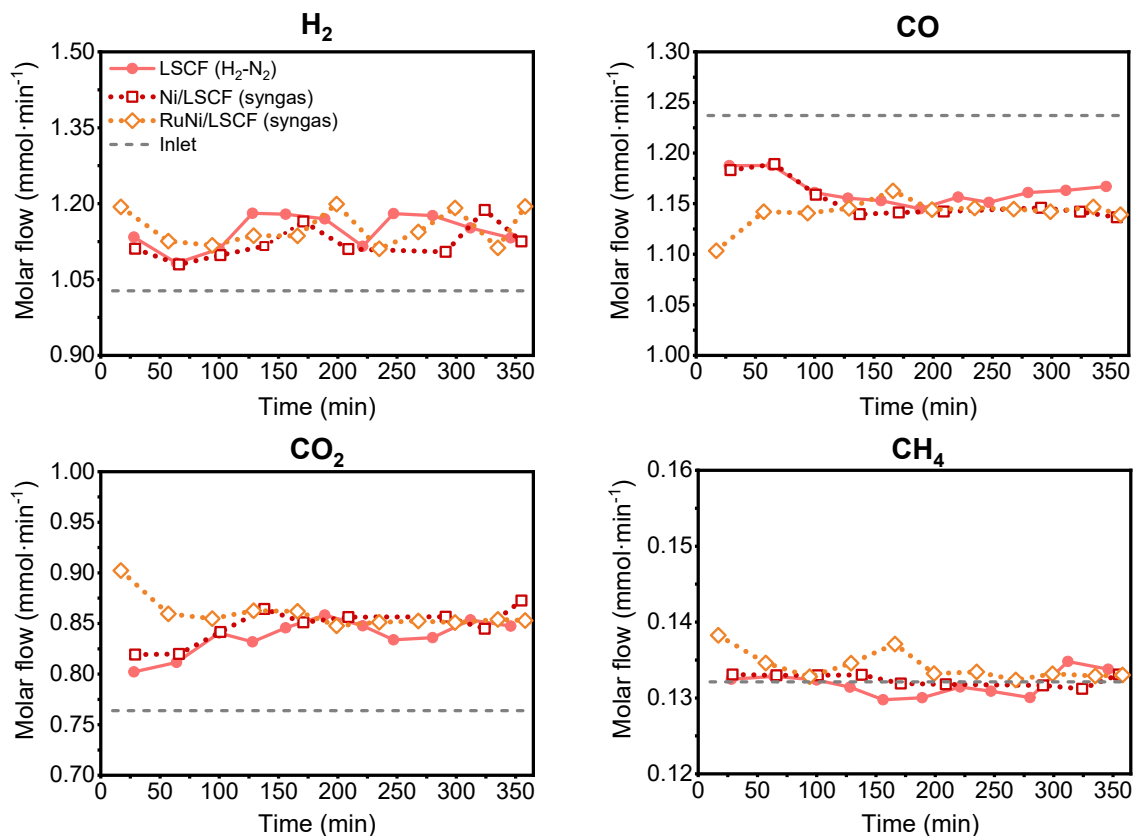

**Fig 9S.** Partial molar flows at the outlet of the reactor vs time during toluene reforming at 550 °C for 6 h over (Ru)Ni/LSCF catalysts and bare LSCF

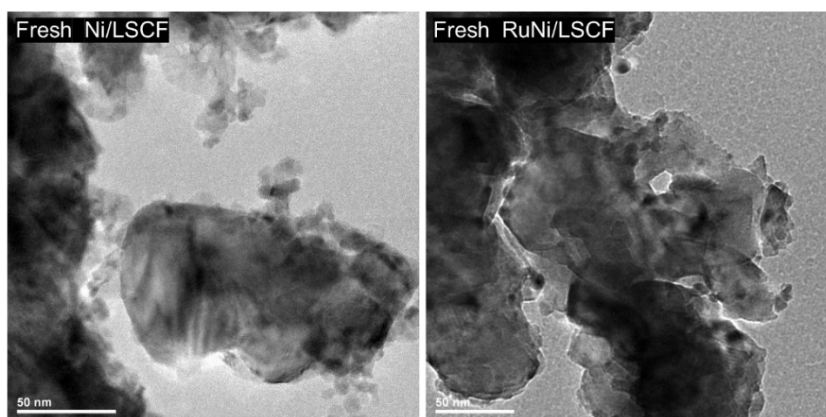

**Fig 10S.** TEM images of fresh (Ru)Ni/LSCF (adapted from ref [2])

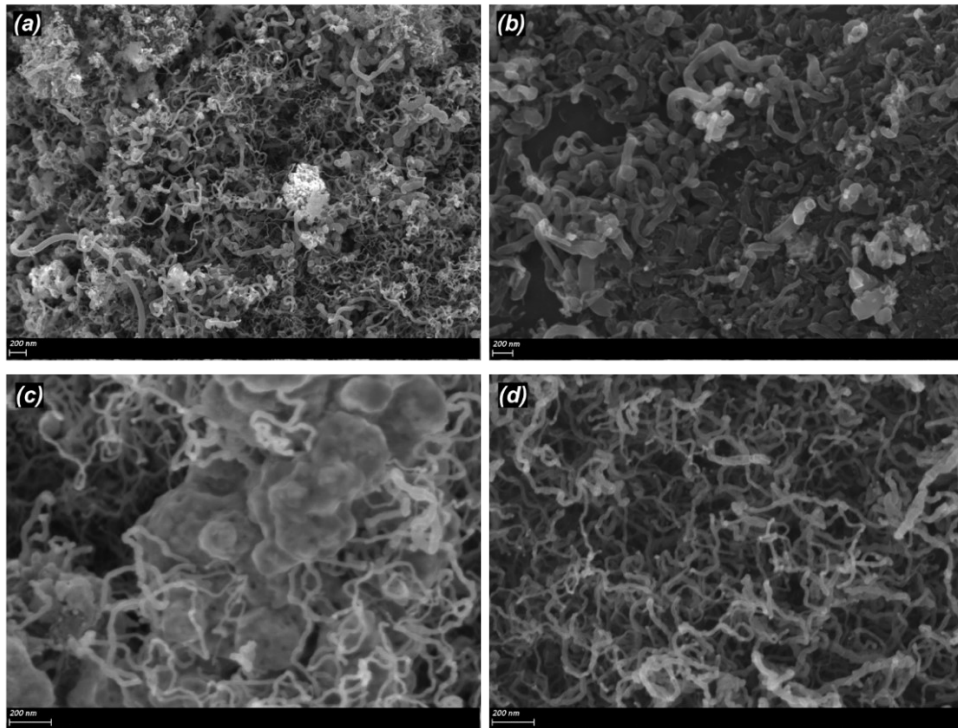

**Fig 11S.** SEM images after toluene reforming reaction at 550 °C for 6 h of **(a)** Ni/LSCF<sub>powder</sub>; **(b)** RuNi/LSCF<sub>powder</sub>; **(c)** Ni/LSCF/SiC and **(d)** RuNi/LSCF/SiC

## References

- [1] L. Jurado, V. Papaefthimiou, S. Thomas, and A. Roger, "Low temperature toluene and phenol abatement as tar model molecules over Ni-based catalysts: Influence of the support and the synthesis method," *Appl. Catal. B Environ.*, vol. 297, p. 120479, Nov. 2021, doi: 10.1016/j.apcatb.2021.120479.
- [2] L. Jurado, V. Papaefthimiou, S. Thomas, and A.-C. Roger, "Upgrading syngas from wood gasification through steam reforming of tars over highly active Ni-perovskite catalysts at relatively low temperature," *Appl. Catal. B Environ.*, vol. 299, p. 120687, Dec. 2021, doi: 10.1016/j.apcatb.2021.120687.
